# Supplementary material for: Understanding the A-site non-stoichiometry in perovskites: promotion of exsolution of metallic nanoparticles and the hydrogen oxidation reaction in solid oxide fuel cells
Source: Royal Society of Chemistry journal article supplement (doi:10.1039/d0se01280g), 2020-10-19
Supplement: d0se01280g1.pdf [file d0se01280g1.pdf]

## Electronic Supplementary Information

### **Understanding of A-site non-stoichiometry in perovskites: promotion of exsolution of metallic nanoparticles and hydrogen oxidation process in solid oxide fuel cells**

Na Yu,<sup>a</sup> Guang Jiang,<sup>b</sup> Tong Liu,<sup>a\*</sup> Xi Chen,<sup>a</sup> Mengyu Miao,<sup>a</sup> Yanxiang Zhang,<sup>b\*\*\*</sup> and Yao Wang<sup>a\*</sup>

<sup>a</sup> Key Laboratory of Hydraulic Machinery Transients (Wuhan University), Ministry of Education, School of Power and Mechanical Engineering, Wuhan University, Wuhan, Hubei 430072, China

<sup>b</sup> National Key Laboratory for Precision Hot Processing of Metals, School of Materials Science and Engineering, Harbin Institute of Technology, Harbin 150001, China

Corresponding Authors

\*Email: [pmewy@whu.edu.cn](mailto:pmewy@whu.edu.cn) (Y. W.), [liu\\_tong@whu.edu.cn](mailto:liu_tong@whu.edu.cn) (T. L.) & [hitzhang@hit.edu.cn](mailto:hitzhang@hit.edu.cn) (Y. Z.)

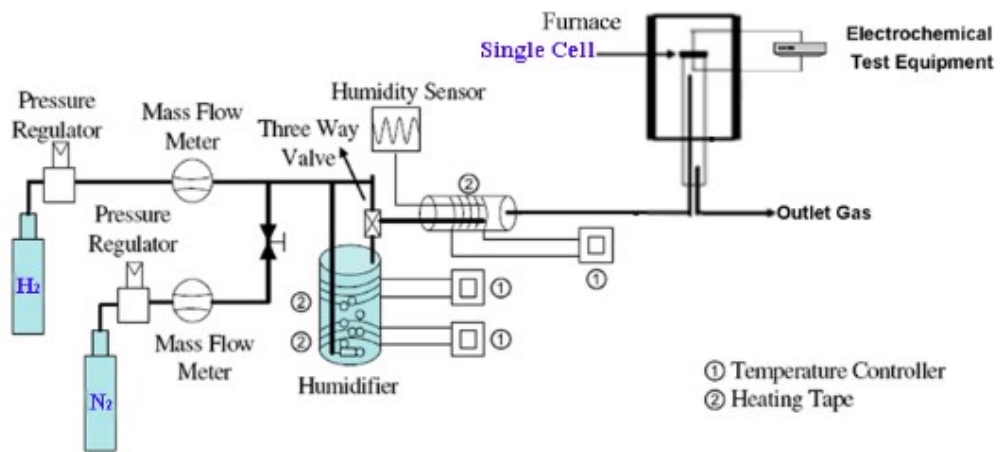

Fig. S1 Schematic diagram of the home-made setup for the measurement of the electrochemical performance of a single cell.

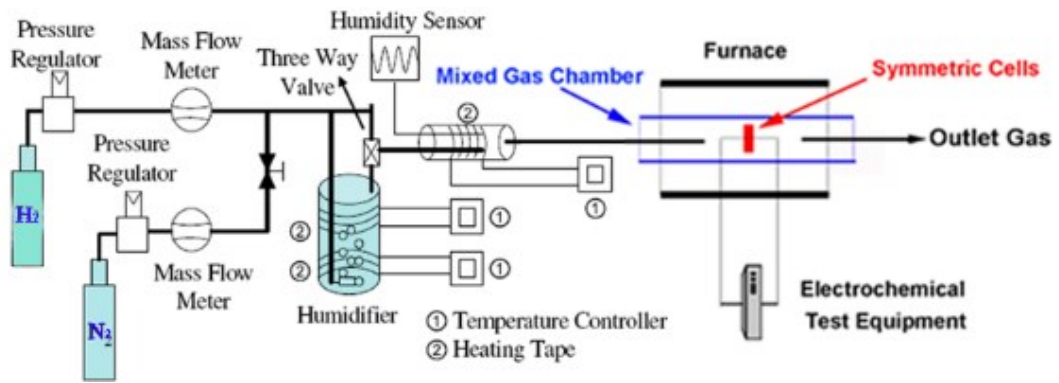

Fig. S2 Schematic diagram of the home-made setup for the measurement of the electrode polarization resistance via a symmetrical cell.

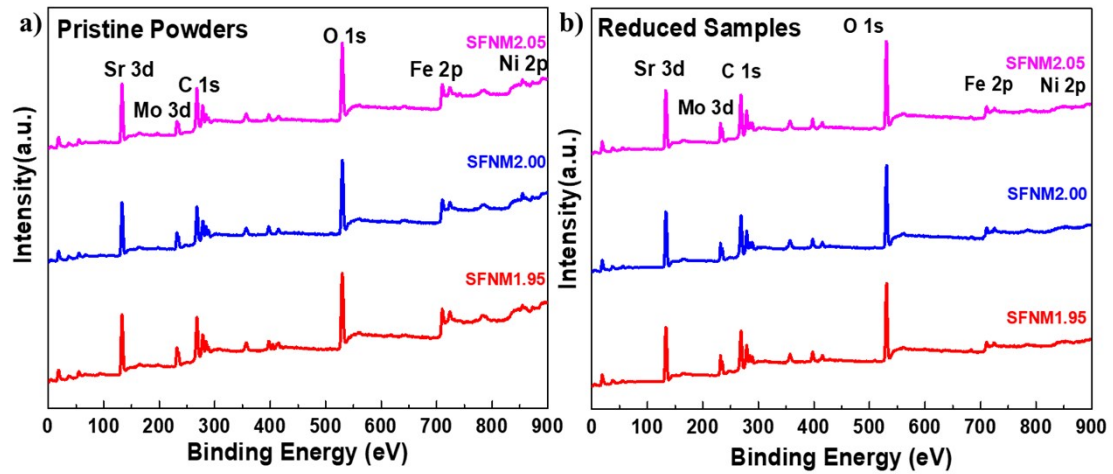

Fig. S3 XPS spectra of pristine SFNM<sub>x</sub> powders and reduced SFNM<sub>x</sub> powders ( $x=1.95, 2.00,$  and  $2.05$ ), a) pristine SFNM<sub>x</sub> powders, and b) reduced SFNM<sub>x</sub> powders.

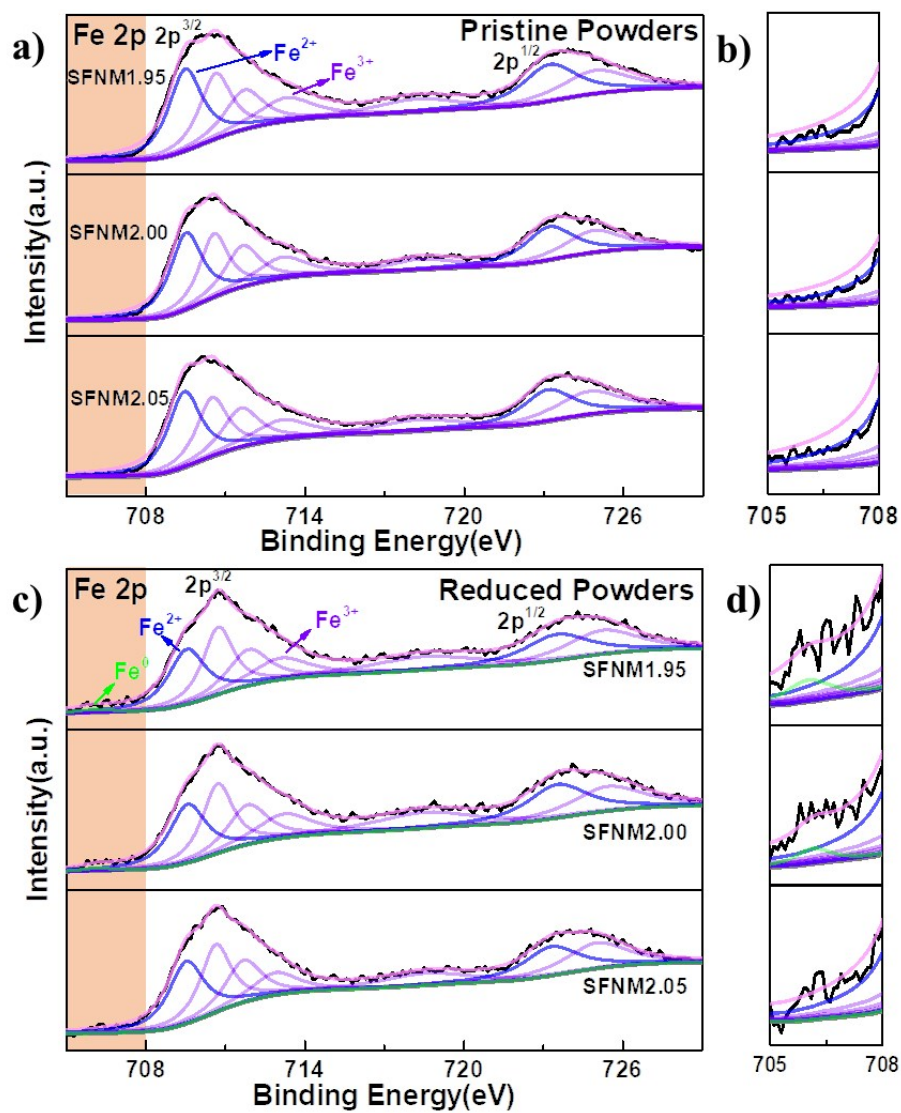

Fig. S4. XPS spectrum of Fe 2p core level regions of a-b) the pristine SFNM<sub>x</sub> powders and c-d) the reduced SFNM<sub>x</sub> powders (x=1.95, 2.00, and 2.05) in the binding energy range of a) and c) 705-729 eV and b) and d) 705-708 eV.

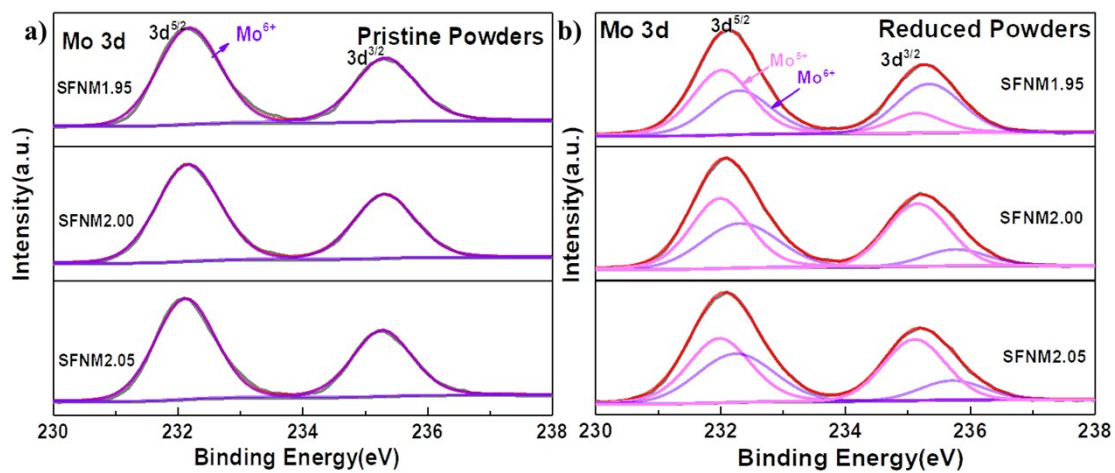

Fig. S5 XPS of Mo 3d of the core level regions of a) pristine SFNM<sub>x</sub> powders and b) reduced SFNM<sub>x</sub> powders ( $x=1.95, 2.00, \text{ and } 2.05$ ).

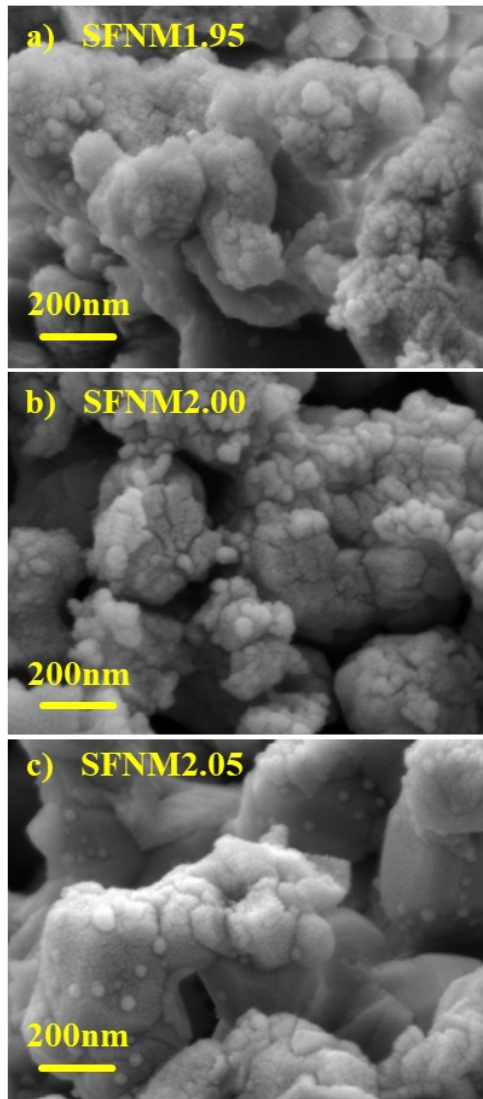

Fig. S6 Cross-sectional SEM images of a) SFNM1.95 electrode, b) SFNM2.00 electrode, and c) SFNM2.05 electrode in the symmetric cells after testing in 97% $\text{H}_2$ -3% $\text{H}_2\text{O}$ .

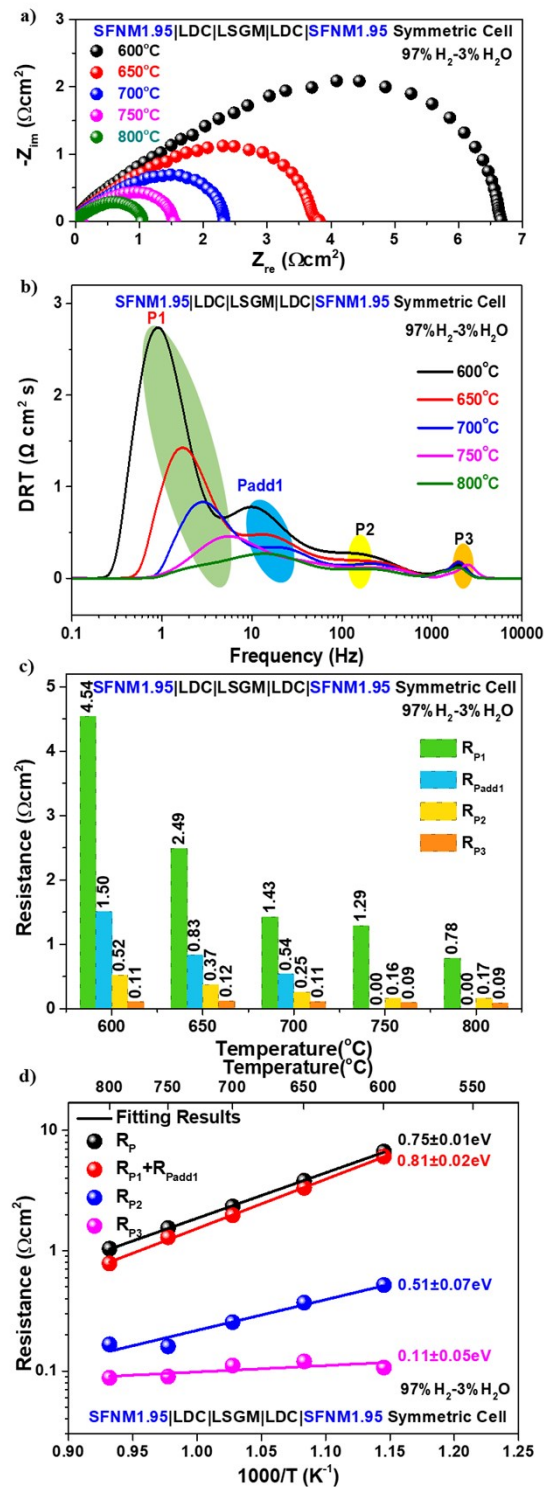

Fig. S7. a) The Nyquist plots, b) the corresponding DRT analysis results, c) resistances of the resolved peaks calculated from the DRT analysis results shown in Fig. S7b, and d) Arrhenius plots of  $R_p$ s and resistances of the resolved peaks shown in Fig. S7c of the symmetrical cell with SFMNi1.95 electrodes in 97% H<sub>2</sub>-3% H<sub>2</sub>O atmosphere measured at 600-800 °C.



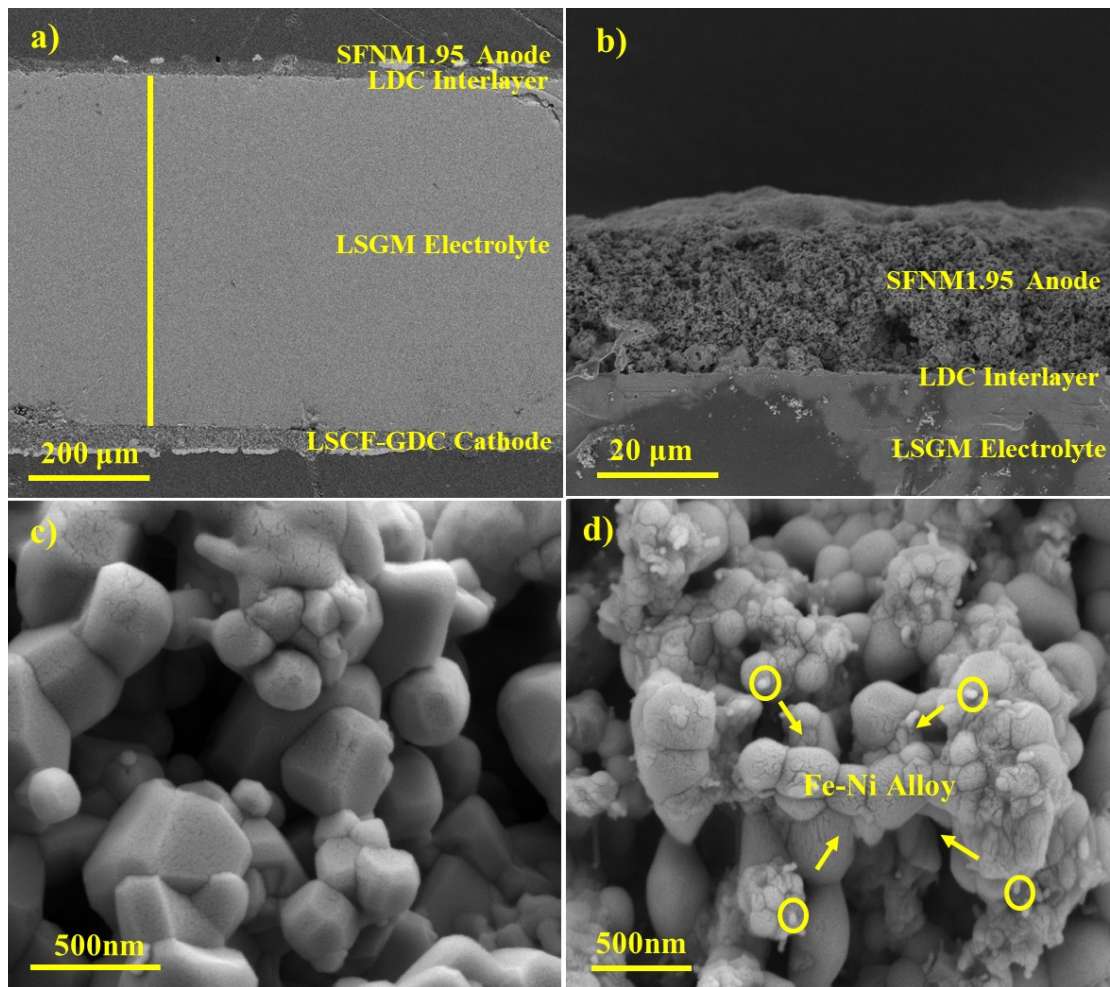

Fig. S8 Cross-sectional SEM images of a) the single cell and b) the interface of anode/interlayer/electrolyte, and SEM images of SFNM1.95 anode c) before and b) after testing.

Table S1 A table of cell performance comparison obtained with various hydrogen electrodes at 800°C using 97%H<sub>2</sub>-3%H<sub>2</sub>O as the feeding gas

| Anode                                                                                                                         | Cathode  | Electrolyte(μm) | R <sub>p</sub> (Ωcm <sup>2</sup> ) | Ref.      |
|-------------------------------------------------------------------------------------------------------------------------------|----------|-----------------|------------------------------------|-----------|
| SFNM1.95                                                                                                                      | LSCF-GDC | LSGM(580)       | 0.25                               | This work |
| Ba <sub>2</sub> FeMoO <sub>6</sub> (BFMO)                                                                                     | SCF      | LSGM(300)       | 1.2                                | [64]      |
| Sr <sub>2</sub> FeMoO <sub>6</sub> (SFMO)                                                                                     | SCF      | LSGM(300)       | 0.91                               | [64]      |
| Ni-YSZ                                                                                                                        | LSCF     | YSZ(20)         | 0.81                               | [65]      |
| SrMo <sub>0.9</sub> Ga <sub>0.1</sub> O <sub>3-δ</sub>                                                                        | SCFO     | LSGM(300)       | 0.66                               | [66]      |
| Sr <sub>1.9</sub> MgMoO <sub>6-δ2</sub>                                                                                       | BSCF     | LSGM(280)       | 0.31                               | [50]      |
| Sr <sub>2</sub> Fe <sub>1.5</sub> Mo <sub>0.5</sub> O <sub>6-δ</sub>                                                          | SFM      | LSGM            | 0.27                               | [71]      |
| La <sub>0.75</sub> Sr <sub>0.25</sub> Cr <sub>0.5</sub> Mn <sub>0.5</sub> O <sub>3-δ</sub>                                    | LSM      | LSGM(120)       | 0.16                               | [72]      |
| MDC infiltrated Ni-YSZ                                                                                                        | LSM-YSZ  | YSZ(30)         | 0.42                               | [69]      |
| La <sub>0.4</sub> Sr <sub>0.6</sub> Fe <sub>0.7</sub> Ti <sub>0.1</sub> Co <sub>0.2</sub> O <sub>3-δ</sub><br>(CoFe@LSFTC-20) | LSFTC-20 | LSGM(300)       | 1.47                               | [63]      |
| La <sub>0.95</sub> Fe <sub>0.8</sub> Ni <sub>0.05</sub> Ti <sub>0.15</sub> O <sub>3</sub> (Ni@LFNT<br>)                       | LSC      | LSGM(350)       | 0.51                               | [67]      |
| (NiO) <sub>0.05</sub> -(SrTi <sub>0.8</sub> Nb <sub>0.2</sub> O <sub>3-δ</sub> ) <sub>0.95</sub><br>(Ni@STN)                  | LSCF     | LSGM(300)       | 0.38                               | [29]      |
| Pr <sub>0.8</sub> Sr <sub>1.2</sub> (Co,Fe) <sub>0.8</sub> Nb <sub>0.2</sub> O <sub>4+δ</sub><br>(CoFe@K-PSCFN-CFA)           | P-PSCFN  | LSGM(30)        | 0.44                               | [68]      |
| La <sub>1.2</sub> Sr <sub>0.8</sub> Mn <sub>0.4</sub> Fe <sub>0.6</sub> O <sub>4-</sub><br>GDC(Fe@LSMF)                       | LSCF-GDC | LSGM(280)       | 0.31                               | [70]      |
